# Supplementary material for: Crohn’s Disease Exclusion Diet for the Treatment of Crohn’s Disease: Real-World Experience from a Tertiary Center
Source: MDPI journal article supplement (doi:10.3390/jcm12165428), 2023-08-21
Supplement: s1 [file s1]

**Supplementary Figure S1. Indications for referral to the CDED (N=220)**

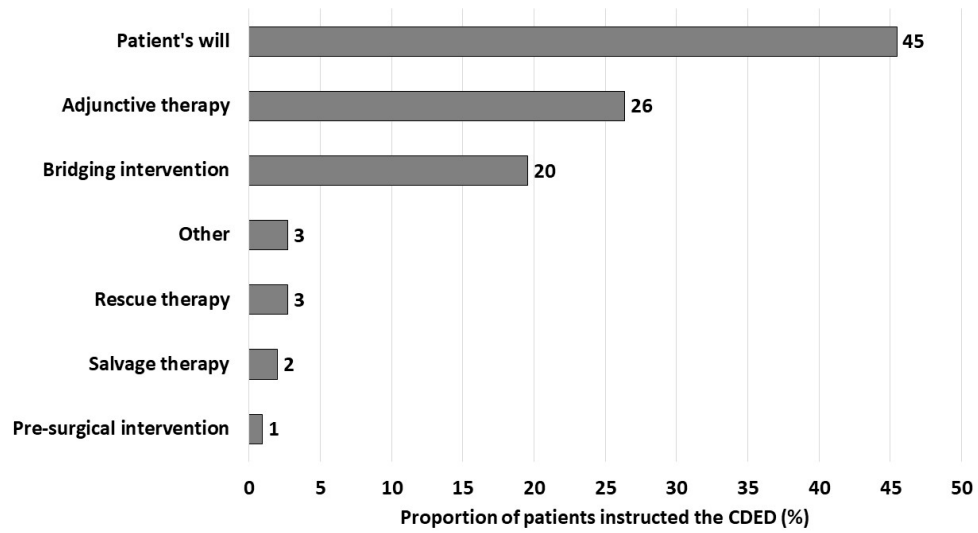

**Supplementary Table S1.** Demographic and disease characteristics of patients who received instructions for the CDED and initiated it, compared to those who did not initiate the diet.

|                                        | All patients<br>N=152 | Initiated<br>CDED<br>(n=96) | Did not initiate<br>CDED (n=56) | P     |
|----------------------------------------|-----------------------|-----------------------------|---------------------------------|-------|
| Demographic characteristics            |                       |                             |                                 |       |
| Age (years, mean±std)                  | 38.0±16.3             | 36.0±15.6                   | 41.6±17.0                       | 0.042 |
| Gender – female n, (%)                 | 64, (42.1)            | 40, (42.1)                  | 24, (42.9)                      | 0.928 |
| Ever smoker n, (%)                     | 52, (34.2)            | 34, (35.4)                  | 18, (31.1)                      | 0.141 |
| Disease duration (years, mean±std)     | 8.0±9.7               | 7.8±9.6                     | 8.3±9.8                         | 0.757 |
| BMI (kg/m², mean±std)                  | 23.3±5.1              | 22.5±3.9                    | 24.6±6.5                        | 0.018 |
| CD Montreal phenotype n, (%)           |                       |                             |                                 |       |
| A1 - Below 16 years                    | 31, (20.4)            | 21, (21.9)                  | 10, (17.9)                      | 0.179 |
| A2 - Between 17 and 40 years           | 80, (52.6)            | 54, (56.3)                  | 26, (46.4)                      |       |
| A3 - Above 40 years                    | 41, (27.0)            | 21, (21.9)                  | 20, (35.7)                      |       |
| L1 - Ileal                             | 97, (63.8)            | 65, (67.7)                  | 32, (57.1)                      | 0.419 |
| L2 - Colonic                           | 5, (3.3)              | 3, (2.0)                    | 2, (1.3)                        |       |
| L3 - Ileo-colonic                      | 50, (32.9)            | 28, (29.2)                  | 22, (39.3)                      |       |
| L4 - Proximal disease                  | 22, (14.5)            | 12, (12.5)                  | 10, (18.2)                      | 0.341 |
| B1 - Non-stricturing, non-penetrating  | 78, (51.3)            | 45, (46.9)                  | 33, (58.9)                      |       |
| B2 - Stricturing                       | 35, (23.0)            | 22, (22.9)                  | 13, (23.2)                      |       |
| B3 - Penetrating                       | 39, (25.7)            | 29, (30.2)                  | 10, (17.9)                      | 0.721 |
| Perianal disease                       | 35, (23.0)            | 23, (24.0)                  | 12, (21.4)                      |       |
| Past surgery n, (%)                    | 43, (28.3)            | 30, (31.2)                  | 13, (23.3)                      | 0.509 |
| Extra-intestinal manifestations n, (%) | 29, (19.1)            | 16, (16.7)                  | 13, (23.2)                      | 0.322 |
| Biologic therapy experience n, (%)     |                       |                             |                                 |       |
| Naïve                                  | 79, (52.0)            | 50, (52.1)                  | 29, (52.7)                      | 0.134 |
| Past therapy                           | 10, (6.6)             | 4, (4.2)                    | 6, (10.9)                       |       |
| Current therapy                        | 62, (40.7)            | 42, (35.4)                  | 20, (36.4)                      |       |
| Disease activity at diet initiation    |                       |                             |                                 |       |
| HBI (mean±std)                         | 5.0±4.0               | 4.7±3.9                     | 5.5±4.0                         | 0.224 |
| CRP (mg/dl, mean±std)                  | 2.4±4.5               | 1.9±2.3                     | 3.2±6.8                         | 0.135 |
|                                        | (n=118)               | (n=75)                      | (n=43)                          |       |
| Fcal (mg/kg, mean±std)                 | 594±1034              | 645±1059                    | 505±998                         | 0.514 |
|                                        | (n=102)               | (n=65)                      | (n=37)                          |       |
| SES-CD score (mean±std)                | 6.7±4.5               | 6.8±4.4                     | 6.6±4.7                         | 0.904 |
|                                        | (n=46)                | (n=27)                      | (n=19)                          |       |
| Rutgeerts score (mean±std)             | 2.0±1.4               | 2.0±1.4                     | 2.2±1.4                         | 0.803 |
|                                        | (n=17)                | (n=12)                      | (n=5)                           |       |
| Active disease <sup>a</sup> n, (%)     | 111, (73.0)           | 72, (75.0)                  | 39, (69.6)                      | 0.576 |

<sup>a</sup> Active disease was defined by at least one of the following: clinical disease activity (HBI≥ 5, biomarker disease activity (Fcal≥250 mg/kg) or endoscopic disease activity (SES-CD ≥ 7 or Rutgeerts score ≥ i2).

Abbreviations: CD - Crohn's disease, BMI - body mass index, CRP - C-reactive protein, Fcal - fecal calprotectin, SES-CD - simple endoscopic score for CD, HBI - Harvey Bradshaw Index

**Supplementary Table S2.** Patient and disease characteristics associated with week-12 clinical response (Patients with active disease, n=72)

|                                                | Clinical<br>response <sup>a</sup><br>(n=33) | No clinical<br>response<br>(n=39) | P      |
|------------------------------------------------|---------------------------------------------|-----------------------------------|--------|
| Demographic characteristics                    |                                             |                                   |        |
| Age (years, mean±std)                          | 35.2±16.3                                   | 35.4±14.5                         | 0.750  |
| Gender – male n, (%)                           | 13, (40.6)                                  | 17, (43.6)                        | 0.801  |
| Ever smoker n, (%)                             | 6, (18.2)                                   | 5, (12.8)                         | 0.529  |
| Disease duration (years, mean±std)             | 7.4±8.7                                     | 6.6±7.5                           | 0.941  |
| BMI (kg/m², mean±std)                          | 22.0±4.2                                    | 22.4±3.4                          | 0.696  |
| Disease characteristics at baseline n, (%)     |                                             |                                   |        |
| A1 - Below 16 years                            | 6, (18.2)                                   | 9, (23.1)                         | 0.878  |
| A2 - Between 17 and 40 years                   | 19, (57.6)                                  | 21, (53.8)                        |        |
| A3 - Above 40 years                            | 8, (24.2)                                   | 9, (23.1)                         |        |
| L1 - Ileal                                     | 24, (72.7)                                  | 22, (56.4)                        | 0.356  |
| L2 - Colonic                                   | 1, (3.0)                                    | 2, (5.1)                          |        |
| L3 - Ileo-colonic                              | 8, (24.2)                                   | 15, (38.5)                        |        |
| L4 - Proximal disease                          | 5, (15.2)                                   | 5, (12.8)                         | 0.776  |
| B1 - Non-stricturing, non-penetrating          | 16, (48.5)                                  | 15, (41.0)                        | 0.797  |
| B2 - Stricturing                               | 8, (24.2)                                   | 10, (25.6)                        |        |
| B3 - Penetrating                               | 9, (27.3)                                   | 13, (33.3)                        |        |
| Perianal disease                               | 7, (21.2)                                   | 9, (23.1)                         | 0.850  |
| Past surgery                                   | 11, (33.3)                                  | 12, (30.8)                        | 0.816  |
| Extra-intestinal manifestations                | 6, (18.2)                                   | 5, (12.8)                         | 0.529  |
| Medical treatment n, (%)                       |                                             |                                   |        |
| Naïve                                          | 19, (57.6)                                  | 20, (51.3)                        | 0.167  |
| Past therapy                                   | 0, (0)                                      | 4, (10.3)                         |        |
| Current therapy                                | 14, (42.4)                                  | 15, (38.5)                        |        |
| Disease activity                               |                                             |                                   |        |
| HBI (mean±std)                                 | 8.1±3.7                                     | 3.7±3.0                           | <0.001 |
| CRP (mg/dl, mean±std)                          | 2.2±1.6                                     | 1.7±2.4                           | 0.032  |
| Fcal (mg/kg, mean±std)                         | 581±949                                     | 895±1257                          | 0.220  |
| Biomarker disease activity n,(%) <sup>b</sup>  | 13, (39.4)                                  | 23, (59.0)                        | 0.098  |
| SES-CD score (mean±std)                        | 9.2±5.2                                     | 5.5±3.6                           | 0.050  |
| Rutgeerts score (mean±std)                     | 2.0±2.0                                     | 2.1±1.4                           | 0.921  |
| Endoscopic disease activity n,(%) <sup>c</sup> | 9, (27.3)                                   | 12, (30.8)                        | 0.745  |
| Indications and adaptations for the CDED n,(%) |                                             |                                   |        |
| Alone                                          | 15, (45.5)                                  | 14, (35.9)                        | 0.745  |
| Adjunctive therapy                             | 9, (27.3)                                   | 8, (20.5)                         |        |
| Bridge therapy                                 | 7, (21.2)                                   | 11, (28.2)                        |        |
| With steroids / antibiotic                     | 2, (6.1)                                    | 6, (15.4)                         | 0.207  |
| Partial enteral nutrition                      | 14, (42.4)                                  | 11, (28.2)                        |        |
| Adherence to the CDED <sup>d</sup> n, (%)      |                                             |                                   |        |
| High adherence to the CDED                     | 26, (78.8)                                  | 22, (56.4)                        | 0.045  |

a Clinical response was determined among patients with active disease (by either clinical, biomarker or endoscopic criteria (n=72), as a drop of  $\geq 3$  HBI points

b Biomarker disease activity was defined as Fcal $\geq 250$  mg/kg d

c Endoscopic disease activity was defined as either SES-CD  $\geq 7$  or Rutgeerts score  $\geq i2$

d High adherence to the diet was defined as fairly/very adherence

**Supplementary Table S3.** Demographic and disease characteristics of patients with a clinically active disease allocated to the CEDED alone compared to those treated with the CEDED on top of other treatment options (n=48).

|                                                 | CEDED alone (n=21) | CEDED with other treatments <sup>a</sup><br>(n=27) | Pv    |
|-------------------------------------------------|--------------------|----------------------------------------------------|-------|
| Age (years, mean±std)                           | 39.0±19.6          | 33.8±13.8                                          | 0.293 |
| Gender – female n, (%)                          | 12, (57.1)         | 16, (59.2)                                         | 0.760 |
| Current smoker n, (%)                           | 8, (38.0)          | 7, (25.9)                                          | 0.963 |
| Disease duration (years, mean±std)              | 5.4±9.5            | 8.6±8.1                                            | 0.215 |
| BMI (kg/m <sup>2</sup> , mean±std)              | 22.5±3.8           | 22.0±4.1                                           | 0.666 |
| A1 - Below 16 years                             | 1, (4.8)           | 7, (25.9)                                          | 0.149 |
| A2 - Between 17 and 40 years                    | 14, (66.7)         | 14, (51.9)                                         |       |
| A3 - Above 40 years                             | 6, (28.6)          | 6, (22.2)                                          |       |
| L1 - Ileal                                      | 17, (81.0)         | 13, (48.1)                                         | 0.018 |
| L2 - Colonic                                    | 1, (4.8)           | 0, (0.0)                                           |       |
| L3 - Ileo-colonic                               | 3, (14.3)          | 14, (51.9)                                         |       |
| L4 - Proximal disease                           | 4, (19.0)          | 4, (14.8)                                          | 0.696 |
| B1 - Non-stricturing, non-penetrating           | 16, (76.2)         | 7, (25.9)                                          |       |
| B2 - Stricturing                                | 4, (19.0)          | 8, (29.6)                                          |       |
| B3 - Penetrating                                | 1, (4.8)           | 12, (44.4)                                         | 0.001 |
| Perianal disease                                | 1, (4.8)           | 12, (44.8)                                         |       |
| Past surgery n, (%)                             | 3, (14.3)          | 13, (48.1)                                         |       |
| Extra-intestinal manifestations n, (%)          | 2, (9.5)           | 7, (25.9)                                          | 0.149 |
| Partial enteral nutrition                       | 6, (28.6)          | 11, (40.7)                                         | 0.382 |
| Clinical response and remission rates           |                    |                                                    |       |
| Clinical remission rate <sup>b</sup> at week 6  | 17, (81.0)         | 13, (48.1)                                         | 0.020 |
| Clinical remission rate <sup>b</sup> at week 12 | 17, (81.0)         | 13, (48.1)                                         | 0.020 |

<sup>a</sup> Patients treated with CEDED and other treatments include those treated as an adjunctive therapy, bridge therapy, or with steroids/antibiotics.

<sup>b</sup> Clinical remission was defined as HBI<5 points

**Supplementary Table S4.** Demographic and disease characteristics of patients with a clinically active disease by follow-up duration with the CDED (n=48).

| <b>Follow-up duration</b>                      | <b>≤6 weeks (n=25)</b> | <b>12-24 weeks (n=21)</b> | <b>&gt;24 weeks (n=2)</b> | <b>Pv</b> |
|------------------------------------------------|------------------------|---------------------------|---------------------------|-----------|
| Age (years, mean±std)                          | 40.1±16.4              | 33.2±17.3                 | 30.0±11.3                 | 0.349     |
| Gender – female n, (%)                         | 17, (68.0)             | 10, (47.6)                | 1, (50.0)                 | 0.455     |
| Current smoker n, (%)                          | 6, (25.0)              | 3, (15.0)                 | 0, (0.0)                  | 0.837     |
| Disease duration (years, mean±std)             | 8.5±8.6                | 5.4±9.2                   | 9.7±13.0                  | 0.490     |
| BMI (kg/m <sup>2</sup> , mean±std)             | 23.4±4.2               | 24.2±3.3                  | 22.3±4.0                  | 0.110     |
| A1 - Below 16 years                            | 6, (24.0)              | 1, (4.8)                  | 1, (50.0)                 | 0.123     |
| A2 - Between 17 and 40 years                   | 11, (44.0)             | 16, (76.2)                | 1, (50.0)                 |           |
| A3 - Above 40 years                            | 8, (32.0)              | 4, (19.0)                 | 0, (0.0)                  |           |
| L1 - Ileal                                     | 12, (48.0)             | 16, (76.2)                | 2, (100.0)                | 0.221     |
| L2 - Colonic                                   | 1, (4.0)               | 0, (0.0)                  | 0, (0.0)                  |           |
| L3 - Ileo-colonic                              | 12, (48.0)             | 5, (23.8)                 | 0, (0.0)                  |           |
| L4 - Proximal disease                          | 4, (16.0)              | 4, (19.0)                 | 0, (0.0)                  | 0.781     |
| B1 - Non-stricturing, non-penetrating          | 11, (44.0)             | 11, (52.4)                | 1, (50.0)                 | 0.805     |
| B2 - Stricturing                               | 7, (28.0)              | 4, (19.0)                 | 1, (50.0)                 |           |
| B3 - Penetrating                               | 7, (28.0)              | 6, (28.3)                 | 0, (0.0)                  |           |
| Perianal disease                               | 8, (32.0)              | 5, (23.8)                 | 0, (0.0)                  | 0.559     |
| Past surgery n, (%)                            | 10, (41.7)             | 5, (25.0)                 | 1, (50.0)                 | 0.610     |
| Extra-intestinal manifestations n, (%)         | 6, (25.0)              | 3, (15.0)                 | 0, (0.0)                  | 0.548     |
| Clinical remission rate at week 6 <sup>a</sup> | 14, (56.0)             | 14, (66.7)                | 2, (100.0)                | 0.047     |

<sup>a</sup> Clinical remission was defined as HBI<5 points
